# Supplementary material
Source: ML conference proceedings conference paper supplement (https://openreview.net/forum?id=KNp7Zq3KkT0)

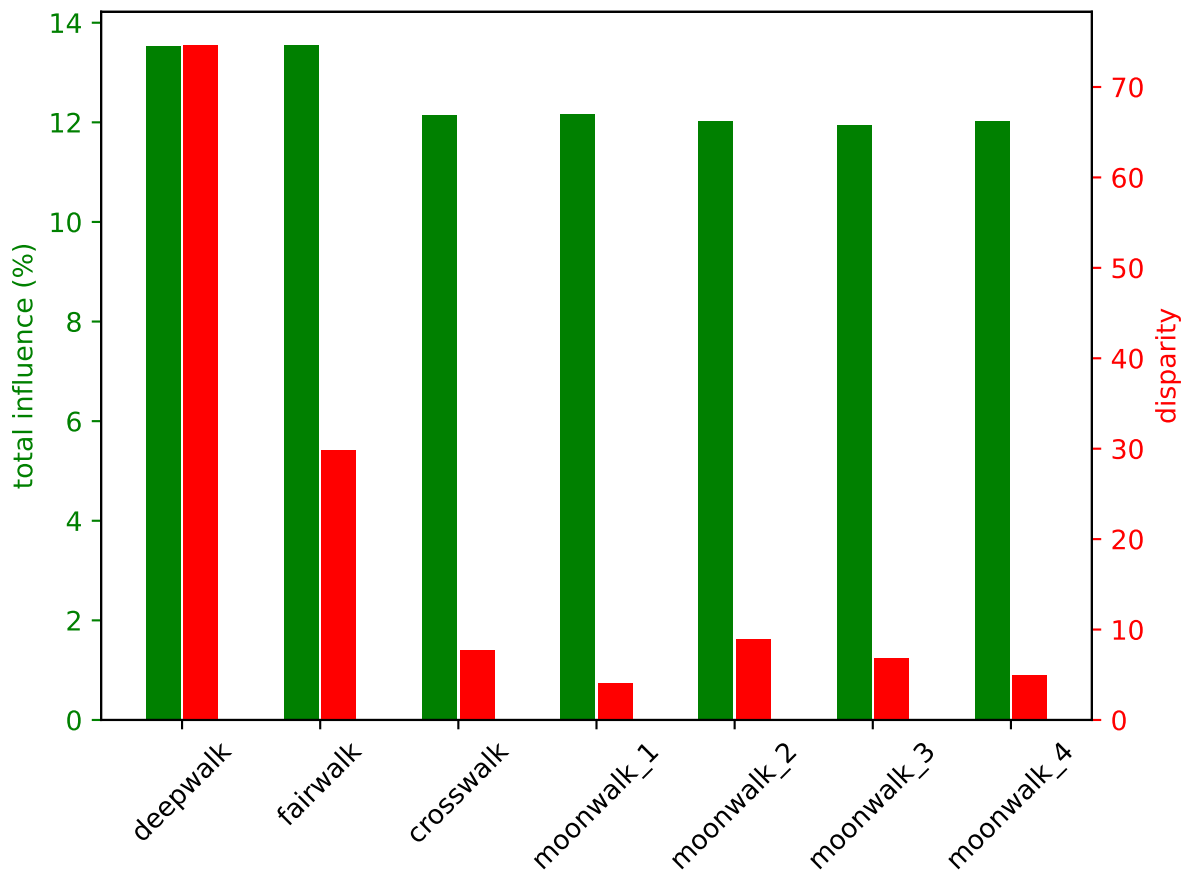

Supplement: supplementary_material [file attachment]

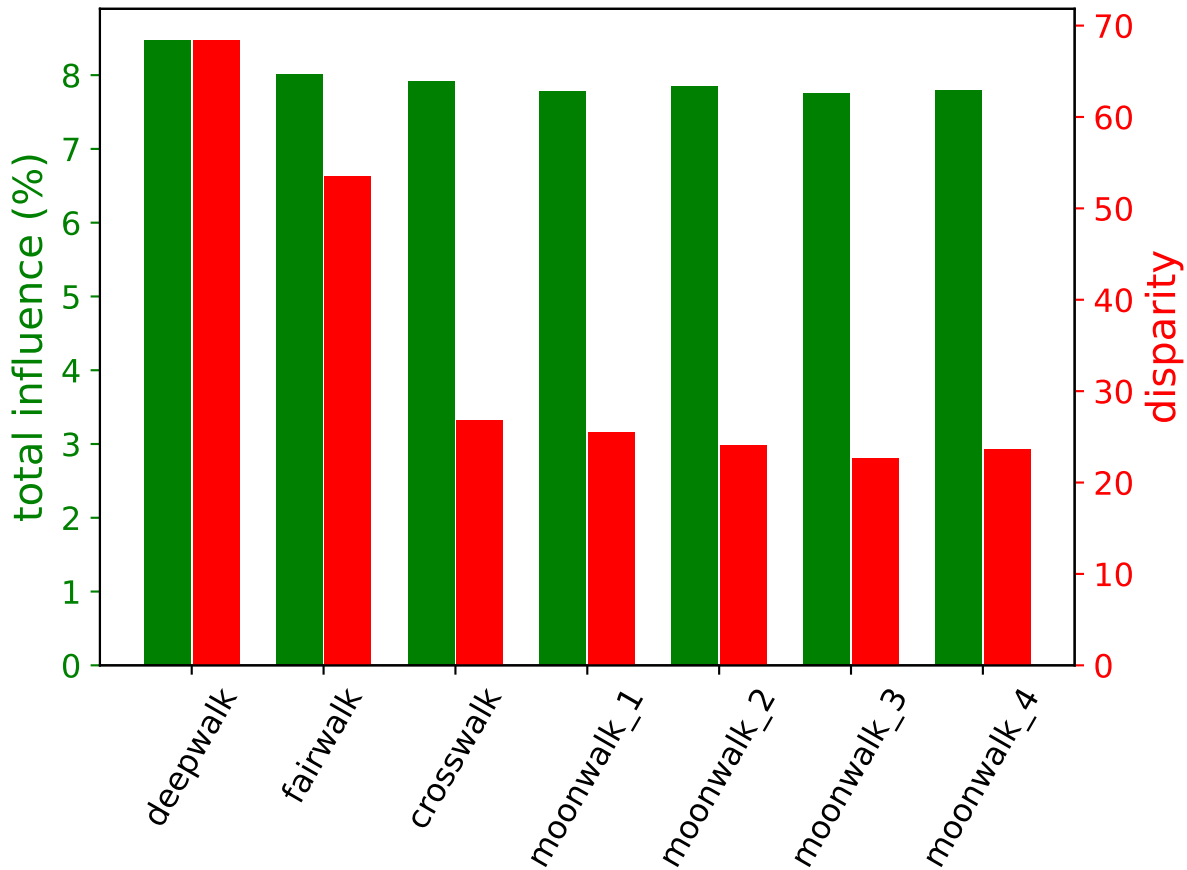

Supplement: supplementary_material [file attachment]

Rice Facebook

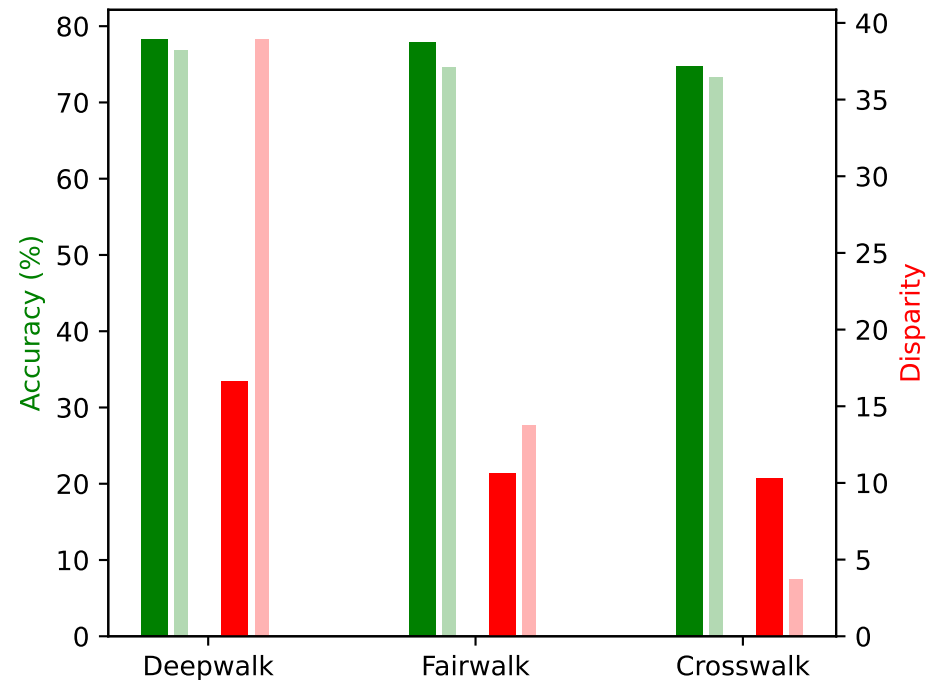

Twitter

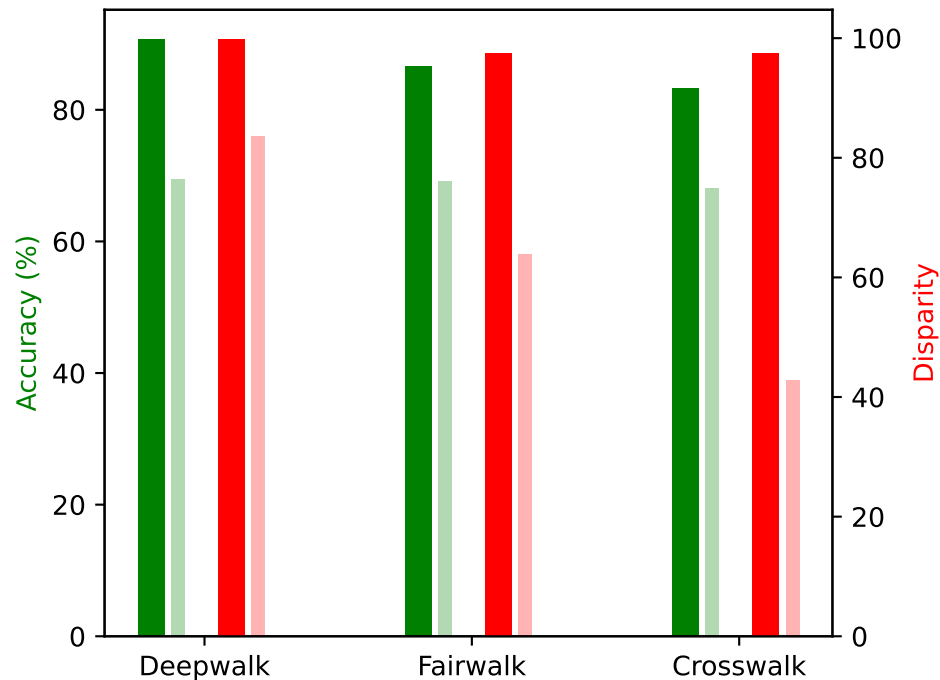

Reproduced

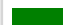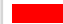

Original

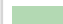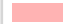

Supplement: supplementary_material [file attachment]

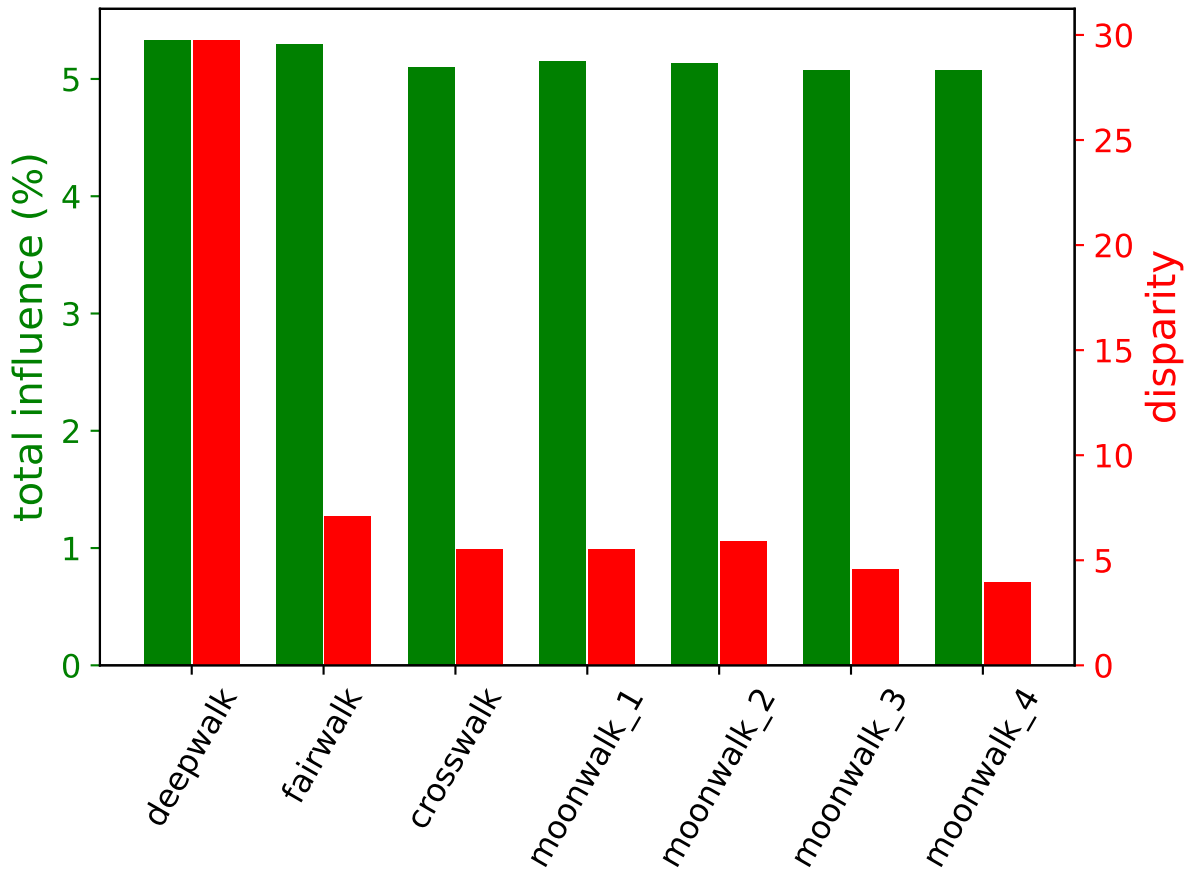

Supplement: supplementary_material [file attachment]

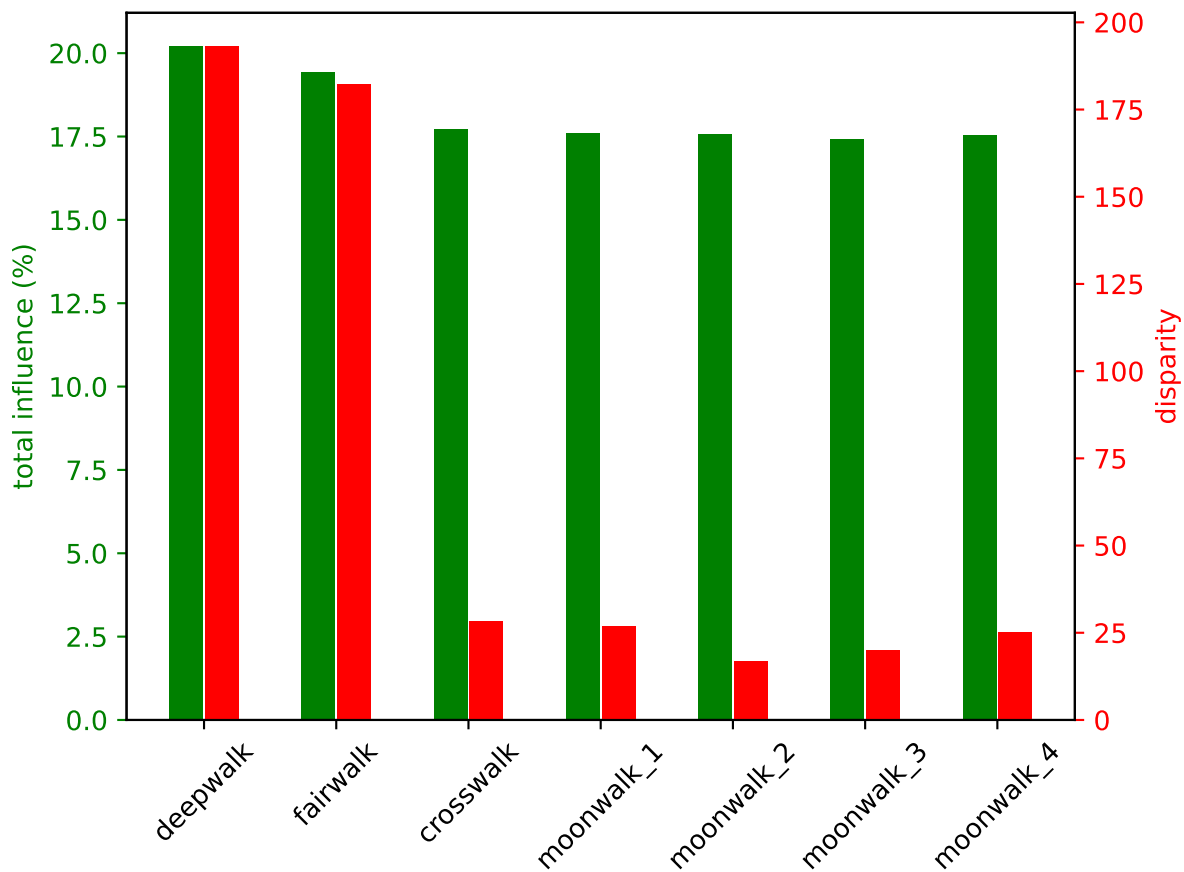

Supplement: supplementary_material [file attachment]

# Rice Facebook

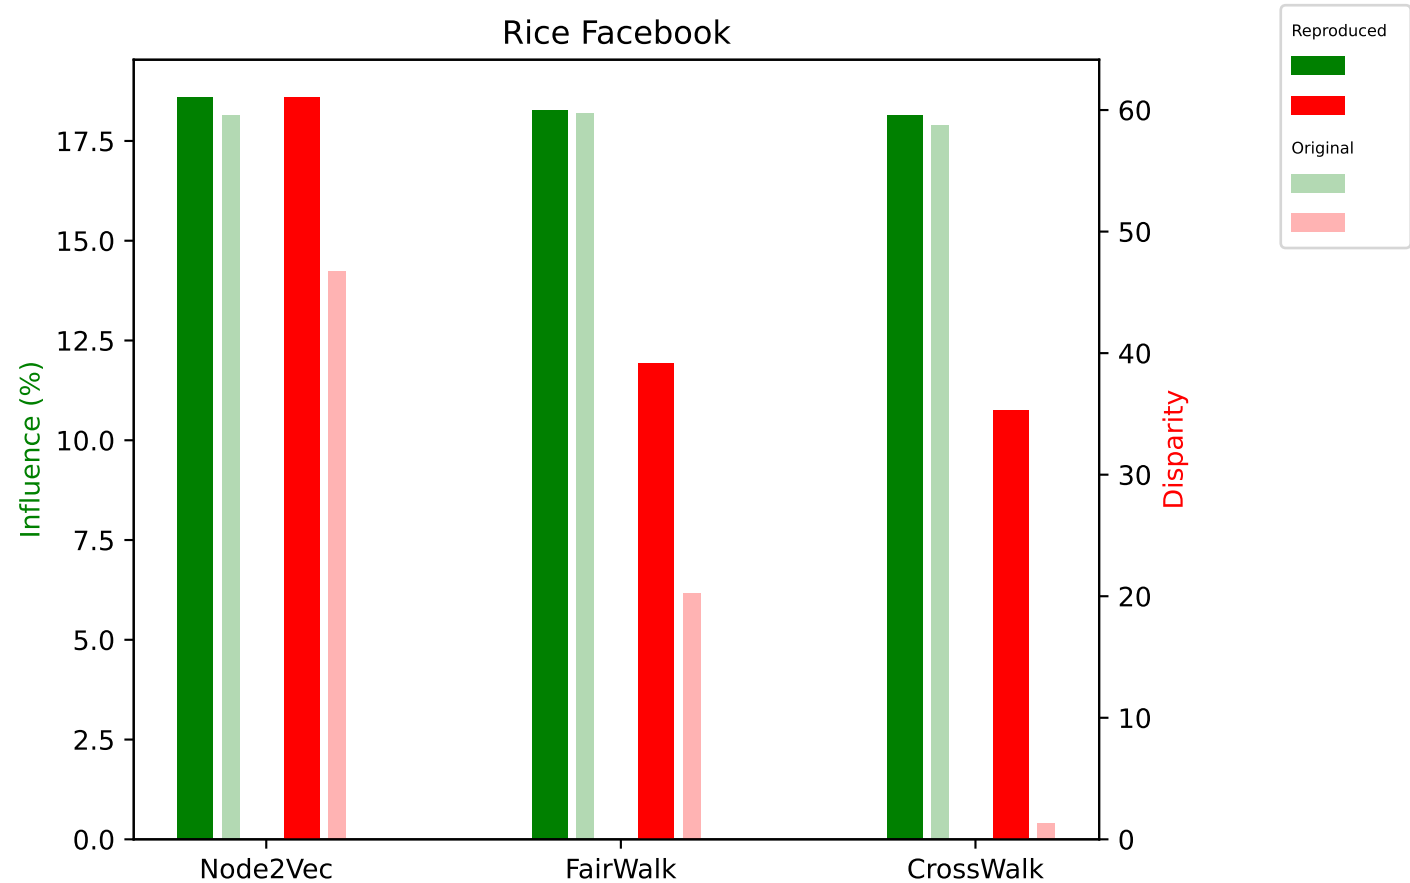

Supplement: supplementary_material [file attachment]

Rice Facebook

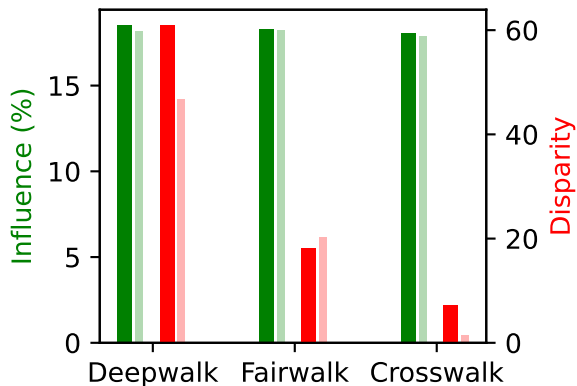

2-grouped synthetic

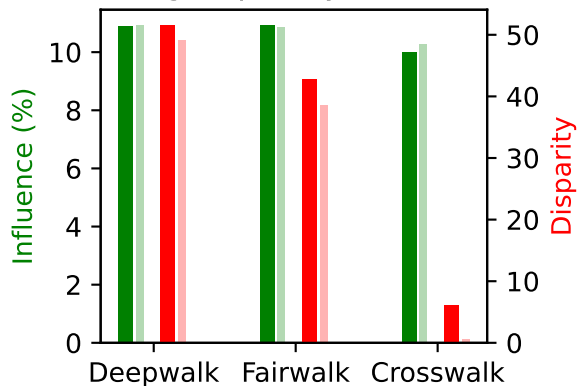

Twitter

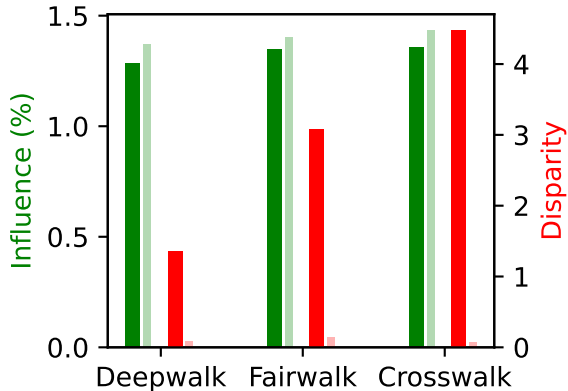

3-grouped synthetic

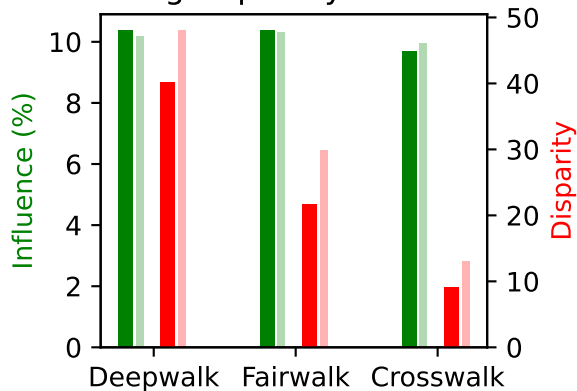

Reproduced

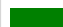

Original

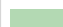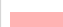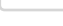

Supplement: supplementary_material [file attachment]

# Rice Facebook

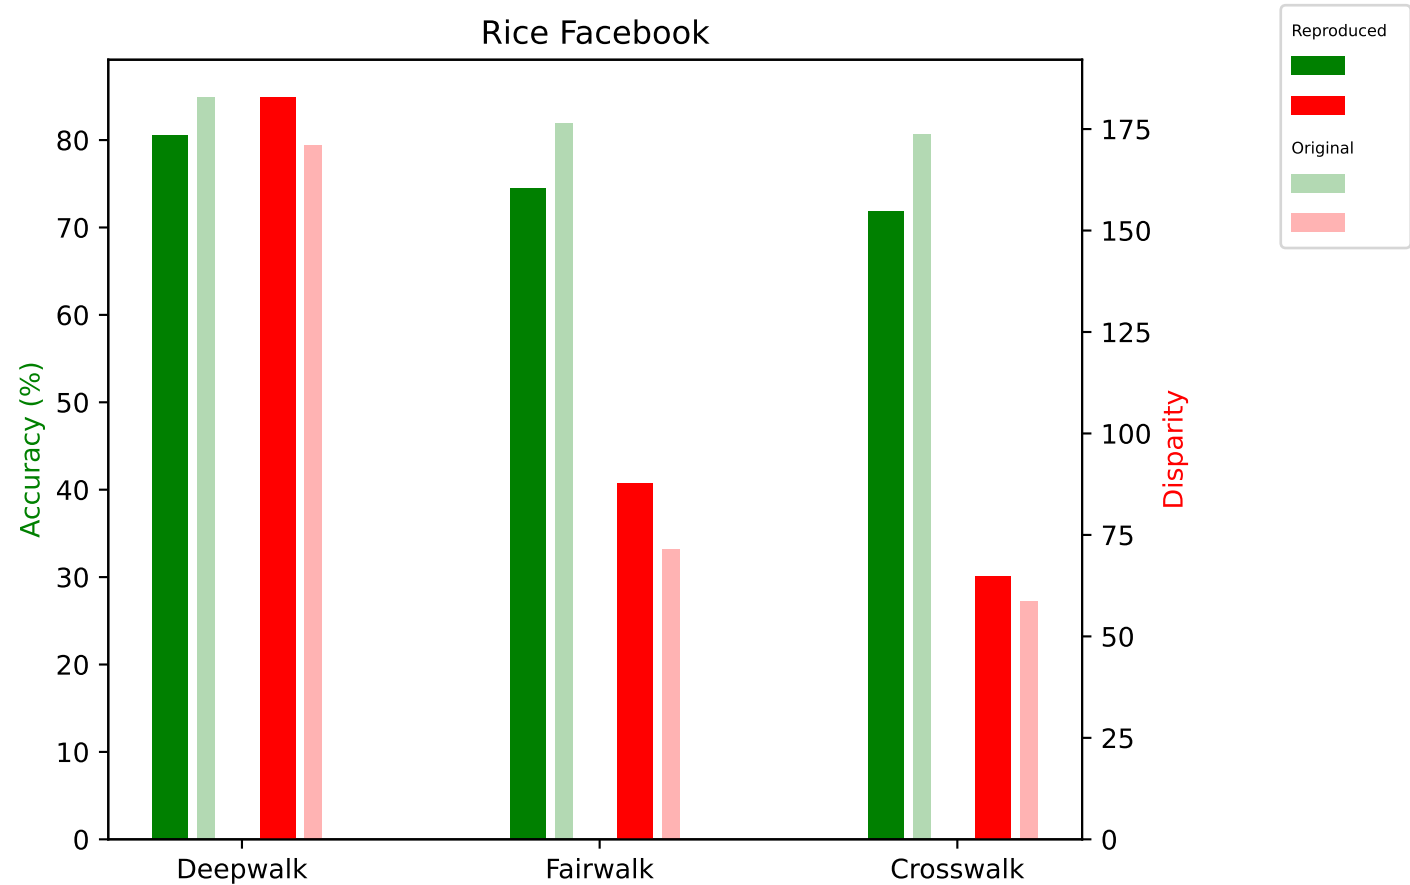

Supplement: supplementary_material [file attachment]
